# Supplementary material
Source: Research Square preprint supplement (doi:10.21203/rs.3.rs-9393871/v1)

**Graphic Abstract**

**
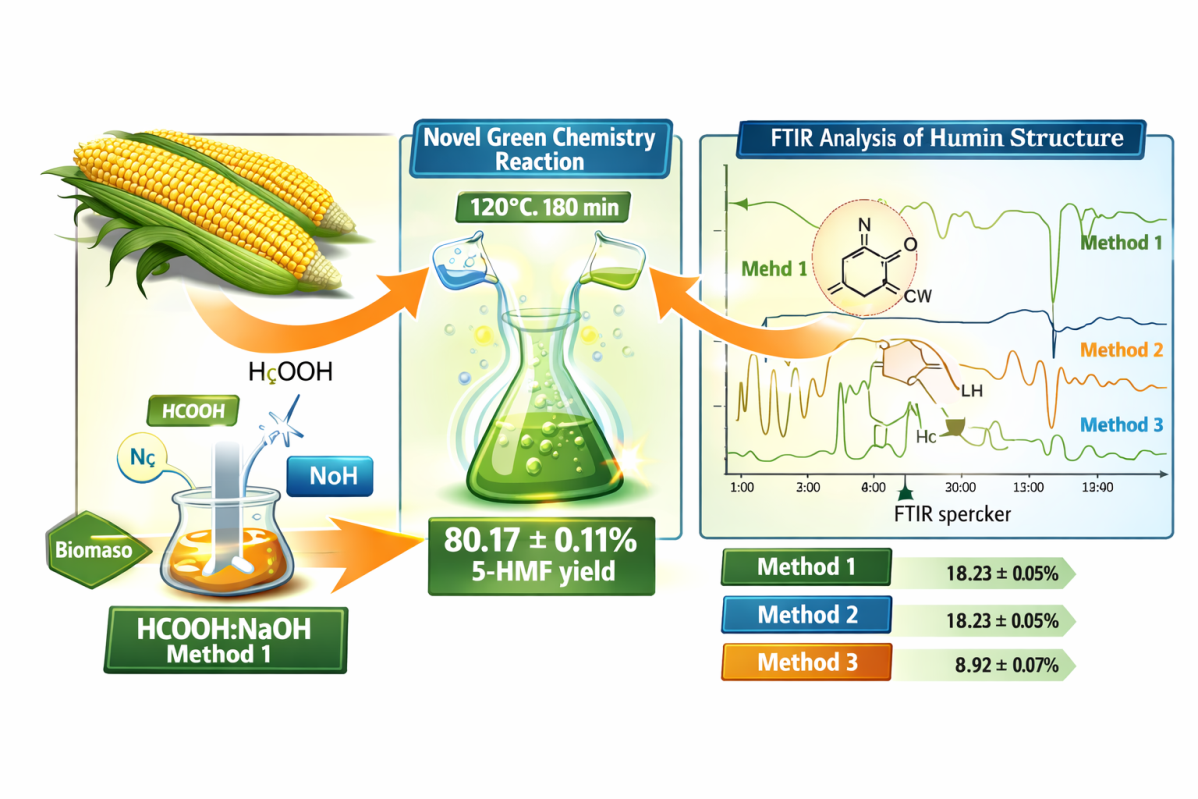
**

Supplement: Supplementary file 1 [file c18faf2a1cb60293bb9eec97.docx]
